# Supplementary material for: Neutral and cationic aluminium complexes of a sterically demanding N-imidoylamidine ligand
Source: Royal Society of Chemistry journal article supplement (doi:10.1039/b513531a), 2006-01-01

Electronic Supplementary Information for Dalton Transactions  
This journal is © The Royal Society of Chemistry 2006

Neutral and Cationic Aluminum-Alkyl and  
Hydride Complexes of A Sterically Demanding  
Diimine Ligand

*Jason D. Masuda and Douglas W. Stephan\**

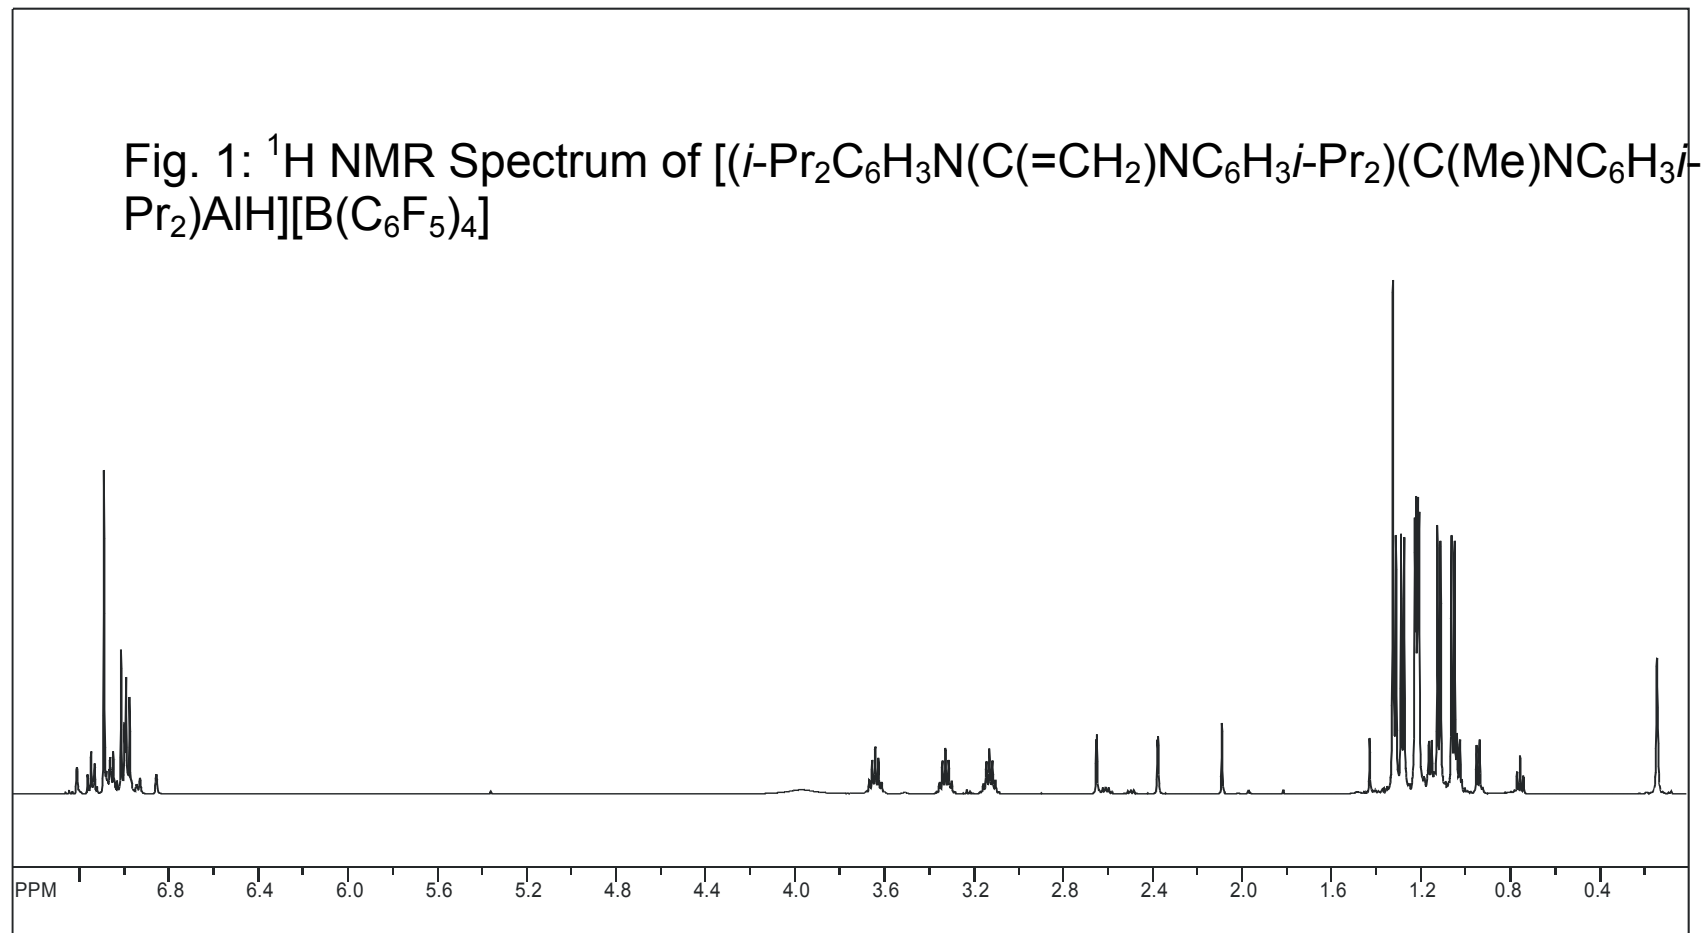

Supplement: b513531a.pdf [file b513531a.pdf]
